# Supplementary material for: Study of the self-degradation performance of a passive direct methanol fuel cell with an Fe–N–C catalyst
Source: Royal Society of Chemistry journal article supplement (doi:10.1039/d4dt03024a), 2025-01-01
Supplement: d4dt03024a1.pdf [file d4dt03024a1.pdf]

## **Study of the self-degradation performance of a passive direct methanol fuel cell with Fe-N-C catalyst**

Chenjun Hou<sup>a</sup>, Weijian Yuan<sup>a,\*</sup>, Shilong Gao<sup>b</sup>, Yujun Zhang<sup>a</sup>, Yufeng Zhang<sup>a</sup>, and  
Xuelin Zhang<sup>a,\*</sup>

<sup>a</sup> School of Astronautics, Harbin Institute of Technology, Harbin, China

<sup>b</sup> State Key Laboratory of Organic-Inorganic Composites, Beijing Advanced  
Innovation Center for Soft Matter Science and Engineering, Beijing University of  
Chemical Technology, Beijing, 100029, People's Republic of China

E-mail: ywj@hit.edu.cn (Weijian Yuan); zhangxuelin@hit.edu.cn (Xuelin Zhang)

## Supporting Information

### 1. Experiment

#### 1.1 Chemicals

Aniline (99.0% purity) and monocyandiamide (49.0% purity) were purchased from Aladdin. hydrochloric acid (HCl, 37%) was purchased from Kermel, and carbon black BP2000 was donated by Cabot Corp. Ferric chloride ( $\text{FeCl}_3$ , 98% purity) and ammonium persulfate ( $(\text{NH}_4)_2\text{S}_2\text{O}_8$ , 98% purity) were purchased from Alfa Aesar.

#### 1.2 Synthesis of Fe-N-C catalysts

2 ml aniline and 3 ml monocyandiamide were dissolved in 80 ml 1.5 M HCl, and 0.4 g carbon black with 3 g  $\text{FeCl}_3$  were dispersed in 80 ml 1.5 M HCl. The above two solutions were mixed, and then 5 g  $(\text{NH}_4)_2\text{S}_2\text{O}_8$  dissolved in 80 ml 1.5 M HCl was added. After polymerization, a heat treatment in 900 °C under  $\text{N}_2$  for 1 h was conducted, and the product was pre-leached in 2 M  $\text{H}_2\text{SO}_4$  at 90 °C for 5 h. The pre-leached powder then underwent a second heat treatment under  $\text{N}_2$  for 2.5 h and under  $\text{NH}_3$  for 0.5 h in 900 °C.

#### 1.3 Characterizations

Scanning electron microscope (SEM) was conducted to observe the morphology of prepared catalysts, and X-ray diffraction (XRD) and Raman spectroscopy were performed to analyze the physical structures and disordered degree of catalysts separately.  $\text{N}_2$  adsorption/desorption test was applied to character the porous structures of catalysts, and X-ray photoelectron spectroscopy (XPS) measurement was utilized to research the chemical components of catalysts.

#### 1.4 Electrochemical measurements

The system of electrochemical measurement was composed of a glassy carbon working electrode, a platinum foil counter electrode and an Hg/Hg<sub>2</sub>SO<sub>4</sub> reference electrode. The working electrodes were prepared by coating the catalyst ink onto the surface of glassy carbon electrode. Particularly, 15 mg Fe-N-C catalyst, 525 μL ethanol and 145 μL Nafion solution (5%) were mixed and stirred for 30 minutes, and then, 7 μL catalyst ink was applied onto the working electrode, making the loading of Fe-N-C catalyst 800 μg cm<sup>-2</sup>. As a comparison, 5 mg 40% Pt/C catalyst, 1.21 mL isopropanol and 40 μL Nafion were well mixed, and 5 μL of catalyst ink was coated on the working electrode, making the loading of Pt 80 μg cm<sup>-2</sup>.

Electron transfer numbers can be calculated according to the Koutecky-Levich (K-L) equation, which can be expressed as:

$$1/j = 1/j_k + 1/j_d = 1/j_k + 1/(0.62nFD^{2/3}\nu^{1/6}C\omega^{1/2}) \quad (1)$$

where  $j$  is the total current density,  $j_k$  is the kinetic current density and  $j_d$  is the diffusion limiting current density. K-L equation relates the limiting current density measured in RDE tests and the number of electron transfer ( $n$ ), the rotation speed ( $\omega$ ) and other parameters including  $F$ , the Faraday constant (96485 C mol<sup>-1</sup>);  $D$ , the diffusion coefficient of oxygen (1.93\*10<sup>-5</sup> cm<sup>2</sup> s<sup>-1</sup>);  $\nu$ , the electrolyte kinematic viscosity (1\*10<sup>-2</sup> cm<sup>2</sup> s<sup>-1</sup>); and  $C$ , the bulk oxygen concentration (1.26\*10<sup>-3</sup> mol dm<sup>-3</sup>). For rotating ring disk electrode (RRDE) test, the ring potential was kept as 1.2 V vs RHE, and the H<sub>2</sub>O<sub>2</sub> yield was calculated according to the Equation (2):

$$\%H_2O_2 = 100 \cdot \frac{\frac{2I_r}{N}}{I_d + \frac{I_r}{N}} \quad (2)$$

where:  $I_d$ ,  $I_r$  and  $N$  represent the disk current, the ring current and the ring collection efficiency (0.37). RRDE tests were performed under 1600 rpm at  $10 \text{ mV s}^{-1}$ .

## 2. Figures

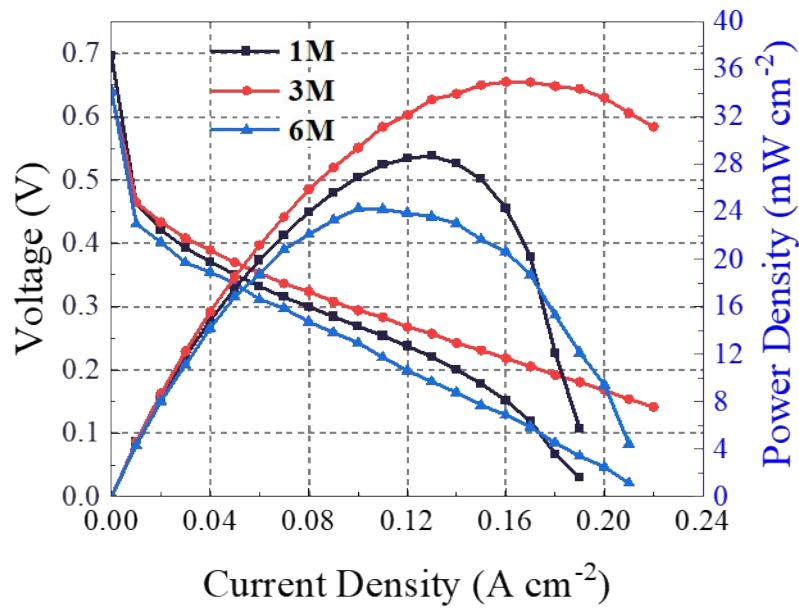

Fig. S1 Polarization curves of Pt/C based DMFC at 60 °C.

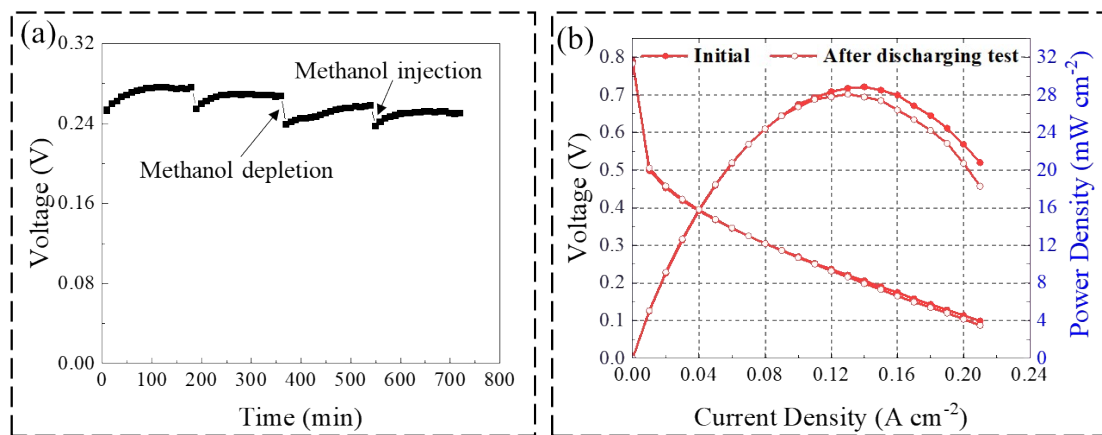

Fig. S2 Discharging curve of a DMFC with a constant current density of  $100 \text{ mA cm}^{-2}$  within 12 hours (a); Polarization curves of a DMFC before and after the stability test (b). The working temperature is 60 °C and the methanol concentration is 3 M.

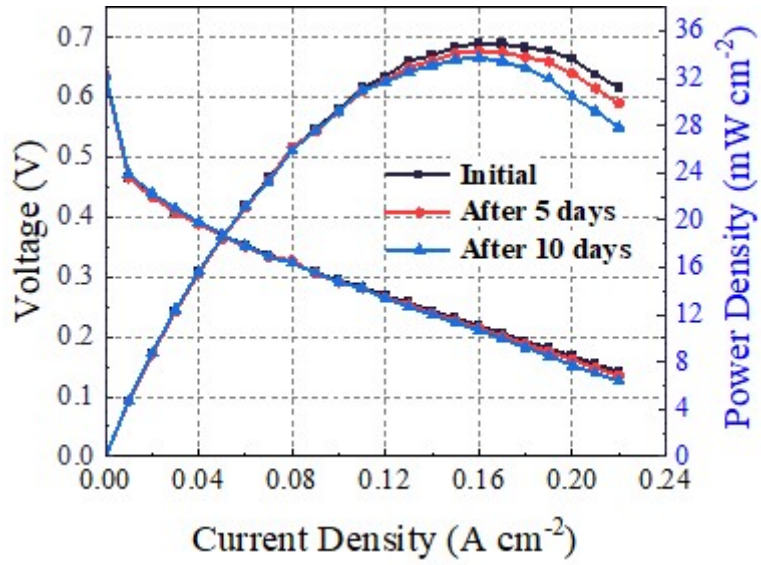

Fig. S3 Polarization curves of Pt/C based DMFC after stationary over several days.

The concentration of supplied methanol is 3 M and the temperature is 60 °C.

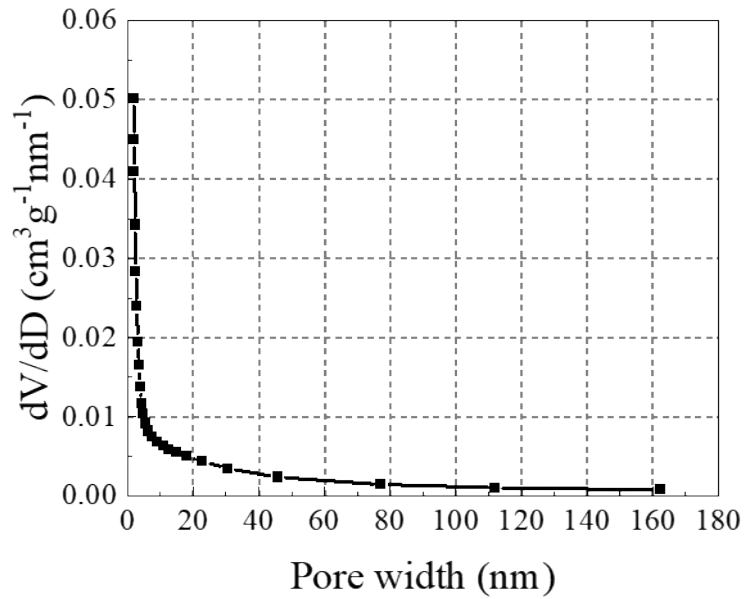

Fig. S4 Pore size contribution curve of prepared Fe-N-C catalyst

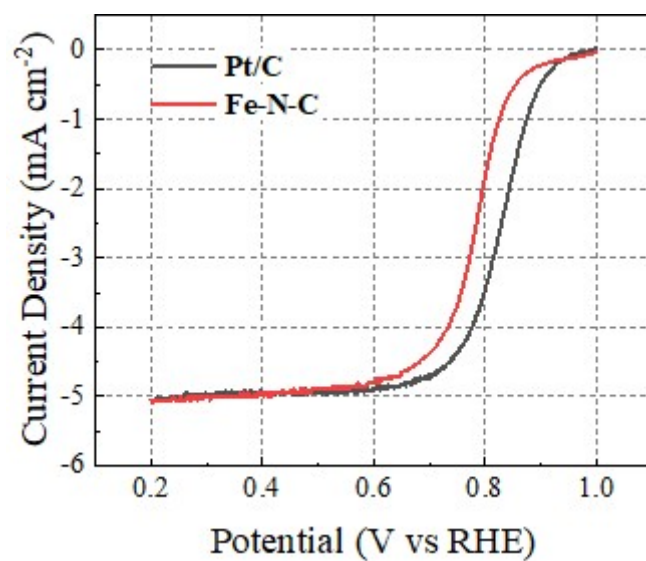

Fig. S5 LSV curves of catalysts tested in O<sub>2</sub>-saturated 0.1M HClO<sub>4</sub>.

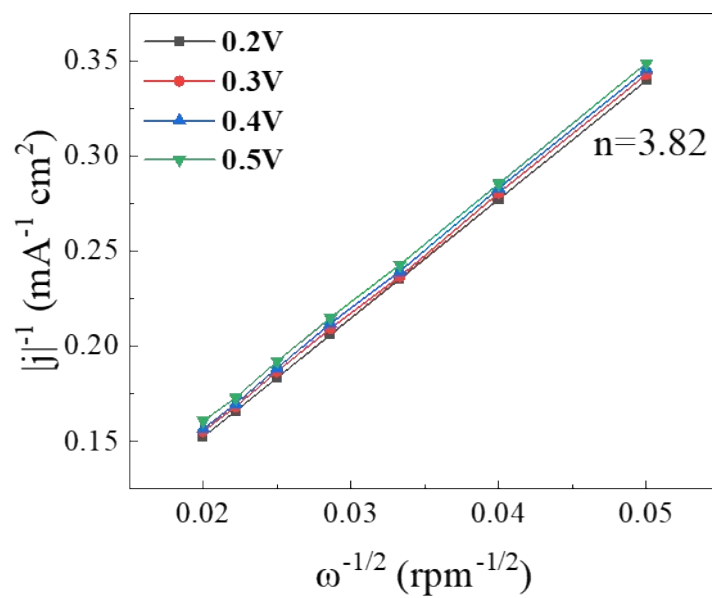

Fig. S6 Koutecky-Levich plots of Fe-N-C tested in O<sub>2</sub>-saturated 0.1 M HClO<sub>4</sub>

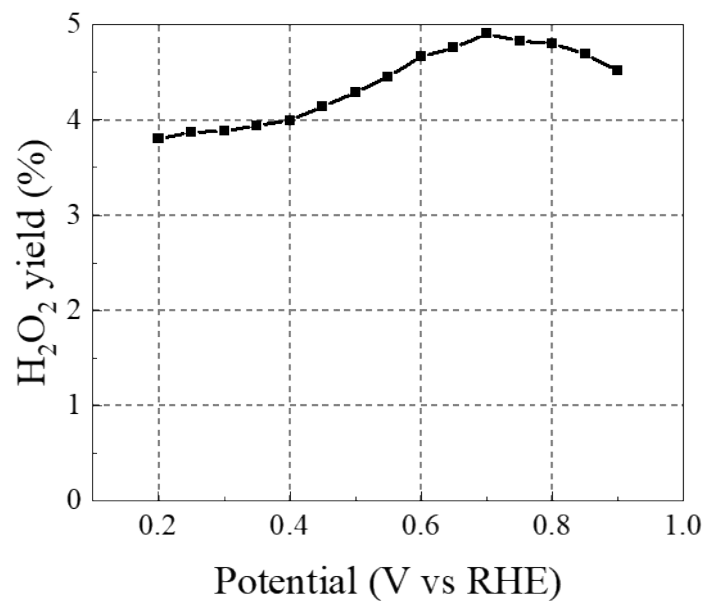

Fig. S7 H<sub>2</sub>O<sub>2</sub> yield of the prepared Fe-N-C catalyst in O<sub>2</sub>-saturated 0.1 M HClO<sub>4</sub>

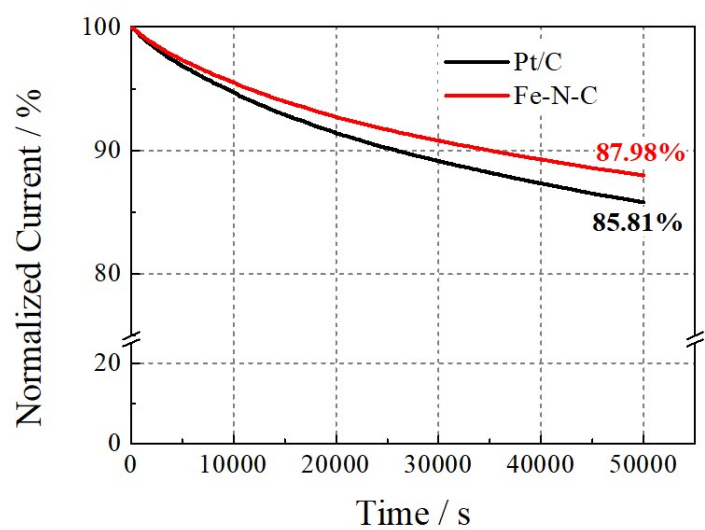

Fig. S8 I-t curves of Pt/C catalyst and Fe-N-C catalyst tested in O<sub>2</sub>-saturated 0.1 M

HClO<sub>4</sub> at 0.5 V vs RHE.

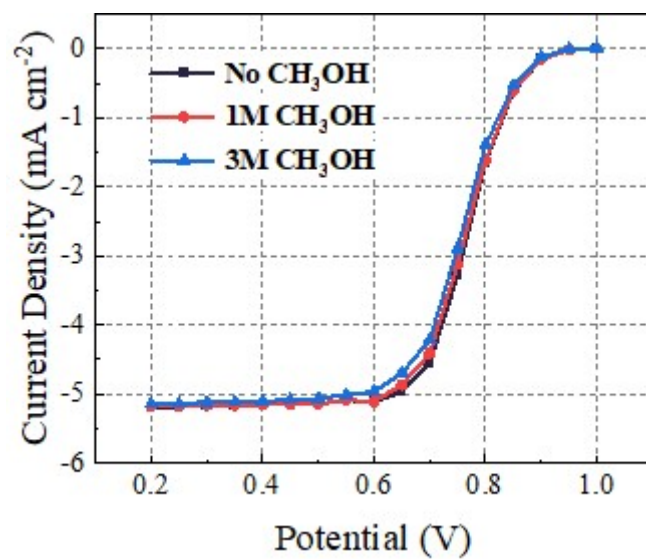

Fig. S9 SCV curves of Fe-N-C based electrode tested in O<sub>2</sub>-saturated 0.1M HClO<sub>4</sub> with the addition of methanol.



Table S1 Summary of the component and performance of PEM-based DMFC with

## Fe-N-C based cathode catalyst

| Cathode                                    | Anode                                   | Reactant                                                     | Performance                             | Ref.                 |
|--------------------------------------------|-----------------------------------------|--------------------------------------------------------------|-----------------------------------------|----------------------|
| 5.0 mg/cm <sup>2</sup><br>50% Nafion       | 4.0mg/cm <sup>2</sup><br>PtRu/C         | 3M CH <sub>3</sub> OH 1mL/min<br>O <sub>2</sub> ,100 mL/min  | 80°C<br>130 mW/cm <sup>2</sup>          | 1                    |
| 2.5mg/cm <sup>2</sup><br>50% Nafion        | 1.0 mg/cm <sup>2</sup><br>Pt/C          | 2M CH <sub>3</sub> OH 1mL/min<br>O <sub>2</sub> ,200 mL/min  | 90°C<br>20 mW/cm <sup>2</sup>           | 2                    |
| 4.5 mg/cm <sup>2</sup><br>45%Nafion        | 1.0 mg/cm <sup>2</sup><br>PtRu/C        | 10M CH <sub>3</sub> OH2mL/min<br>O <sub>2</sub> ,100 mL/min  | 90°C<br>48 mW/cm <sup>2</sup>           | 3                    |
| 2.5 mg/cm <sup>2</sup><br>45%Nafion        | 2.5 mg/cm <sup>2</sup><br>PtRu/C        | 5M CH <sub>3</sub> OH 2mL/min<br>O <sub>2</sub> ,100 mL/min  | 110°C<br>11.2 mW/cm <sup>2</sup>        | 4                    |
| 4.0 mg/cm <sup>2</sup><br>45%Nafion        | 1.0 mg/cm <sup>2</sup><br>PtRu/C        | 2M CH <sub>3</sub> OH 2mL/min<br>O <sub>2</sub> ,100 mL/min  | 90°C<br>10.5 mW/cm <sup>2</sup>         | 5                    |
| 3.0 mg/cm <sup>2</sup><br>45%Nafion        | 1.0 mg/cm <sup>2</sup><br>PtRu/C        | 10M CH <sub>3</sub> OH 2mL/min<br>O <sub>2</sub> ,100 mL/min | 90°C<br>22 mW/cm <sup>2</sup>           | 6                    |
| 7.4 mg/cm <sup>2</sup><br>45%Nafion        | 1.0 mg/cm <sup>2</sup><br>PtRu/C        | 10M CH <sub>3</sub> OH 2mL/min<br>O <sub>2</sub> ,100 mL/min | 90°C<br>30 mW/cm <sup>2</sup>           | 7                    |
| 5.0 mg/cm <sup>2</sup><br>66.7%Nafion      | 2.0 mg/cm <sup>2</sup><br>PtRu/C        | 1M CH <sub>3</sub> OH 2mL/min<br>O <sub>2</sub> ,400 mL/min  | 80°C<br>32 mW/cm <sup>2</sup>           | 8                    |
| 4.0mg/cm <sup>2</sup><br>25%Nafion         | 1.5 mg/cm <sup>2</sup><br>PtRu/C        | 2M CH <sub>3</sub> OH 20mL/min<br>O <sub>2</sub> ,500 mL/min | 50°C<br>20.9 mW/cm <sup>2</sup>         | 9                    |
| 4.0 mg/cm <sup>2</sup><br>45%Nafion        | 4.0 mg/cm <sup>2</sup><br>PtRu/C        | 10M CH <sub>3</sub> OH 2mL/min<br>O <sub>2</sub> ,100 mL/min | 90°C<br>60 mW/cm <sup>2</sup>           | 10                   |
| 5.0 mg/cm <sup>2</sup><br>50%Nafion        | 2.0 mg/cm <sup>2</sup><br>PtRu/C        | 5M CH <sub>3</sub> OH 10mL/min<br>O <sub>2</sub> ,25 mL/min  | 20°C<br>6 mW/cm <sup>2</sup>            | 11                   |
| 4.0 mg/cm <sup>2</sup><br>45%Nafion        | 2.7 mg/cm <sup>2</sup><br>PtRu/C        | 0.5M CH <sub>3</sub> OH 1.8mL/min<br>Air,500 mL/min          | 75°C<br>58 mW/cm <sup>2</sup>           | 12                   |
| 5.0 mg/cm <sup>2</sup><br>50%Nafion        | 2.0 mg/cm <sup>2</sup><br>PtRu/C        | 1M CH <sub>3</sub> OH 2.5mL/min<br>Air,100 mL/min            | 70°C<br>14.9 mW/cm <sup>2</sup>         | 13                   |
| 4.0 mg/cm <sup>2</sup><br>45%Nafion        | 4.0 mg/cm <sup>2</sup><br>PtRu/C        | 2M CH <sub>3</sub> OH<br>Air-breathing                       | 60°C<br>19.48 mW/cm <sup>2</sup>        | 14                   |
| 5.0 mg/cm <sup>2</sup><br>50%Nafion        | 4.0 mg/cm <sup>2</sup><br>PtRu/C        | 1M CH <sub>3</sub> OH<br>Air-breathing                       | 30°C<br>11.72 mW/cm <sup>2</sup>        | 15                   |
| <b>8.0 mg/cm<sup>2</sup><br/>45%Nafion</b> | <b>4.0 mg/cm<sup>2</sup><br/>PtRu/C</b> | <b>3M CH<sub>3</sub>OH<br/>Air-breathing</b>                 | <b>60°C<br/>28.85 mW/cm<sup>2</sup></b> | <b>This<br/>Work</b> |

Table S2 Summary of the performance of the PEM-based DMFC with Fe-N-C and

Pt/C cathode catalysts

| $P_{\max}@Fe-N-C$              | $P_{\max}@Pt/C$                | Tem.        | $P_{\max}@Fe-N-C / P_{\max}@Pt/C$ | Ref.             |
|--------------------------------|--------------------------------|-------------|-----------------------------------|------------------|
| 6.5 mW/cm <sup>2</sup>         | 11.1 mW/cm <sup>2</sup>        | 30°C        | 58.6%                             | 7                |
| 22.6 mW/cm <sup>2</sup>        | 30.9mW/cm <sup>2</sup>         | 90°C        | 73.1%                             | 16               |
| 19.6 mW/cm <sup>2</sup>        | 30.9mW/cm <sup>2</sup>         | 90°C        | 63.4%                             | 2                |
| 38.47 mW/cm <sup>2</sup>       | 60 mW/cm <sup>2</sup>          | 70°C        | 64.1%                             | 17               |
| 71 mW/cm <sup>2</sup>          | 115 mW/cm <sup>2</sup>         | 80°C        | 61.7%                             | 18               |
| 19.48 mW/cm <sup>2</sup>       | 33.95mW/cm <sup>2</sup>        | 60°C        | 57.4%                             | 14               |
| 58 mW/cm <sup>2</sup>          | 120 mW/cm <sup>2</sup>         | 60°C        | 48.3%                             | 12               |
| 21.5 mW/cm <sup>2</sup>        | 115 mW/cm <sup>2</sup>         | 70°C        | 18.7%                             | 19               |
| <b>28.85 mW/cm<sup>2</sup></b> | <b>34.94 mW/cm<sup>2</sup></b> | <b>60°C</b> | <b>82.6%</b>                      | <b>This Work</b> |

## Reference:

1. Y.-C. Wang, L. Huang, P. Zhang, Y.-T. Qiu, T. Sheng, Z.-Y. Zhou, G. Wang, J.-G. Liu, M. Rauf, Z.-Q. Gu, W.-T. Wu and S.-G. Sun, *ACS Energy Letters*, 2017, **2**, 645-650.
2. L. Osmieri, R. Escudero-Cid, A. H. A. Monteverde Videla, P. Ocón and S. Specchia, *Applied Catalysis B: Environmental*, 2017, **201**, 253-265.
3. D. Sebastián, A. Serov, K. Artyushkova, J. Gordon, P. Atanassov, A. S. Aricò and V. Baglio, *ChemSusChem*, 2016, **9**, 1986-1995.
4. A. H. A. Monteverde Videla, D. Sebastián, N. S. Vasile, L. Osmieri, A. S. Aricò, V. Baglio and S. Specchia, *Int. J. Hydrogen Energy*, 2016, **41**, 22605-22618.
5. C. Lo Vecchio, A. Aricò and V. Baglio, *Materials*, 2018, **11**.
6. D. Sebastián, A. Serov, K. Artyushkova, P. Atanassov, A. S. Aricò and V. Baglio, *J. Power Sources*, 2016, **319**, 235-246.
7. D. Sebastián, V. Baglio, A. S. Aricò, A. Serov and P. Atanassov, *Applied Catalysis B: Environmental*, 2016, **182**, 297-305.
8. J. C. Park and C. H. Choi, *J. Power Sources*, 2017, **358**, 76-84.
9. Y. Hu, J. Zhu, Q. Lv, C. Liu, Q. Li and W. Xing, *Electrochim. Acta*, 2015, **155**, 335-340.
10. D. Sebastián, A. Serov, I. Matanovic, K. Artyushkova, P. Atanassov, A. S. Aricò and V. Baglio, *Nano Energy*, 2017, **34**, 195-204.
11. S. Baranton, C. Coutanceau, J. M. Léger, C. Roux and P. Capron, *Electrochim. Acta*, 2005, **51**, 517-525.

12. Q. Li, T. Wang, D. Havas, H. Zhang, P. Xu, J. Han, J. Cho and G. Wu, *Advanced Science*, 2016, **3**.
13. R. Mei, J. Xi, L. Ma, L. An, F. Wang, H. Sun, Z. Luo and Q. Wu, *J. Electrochem. Soc.*, 2017, **164**, F1556-F1565.
14. X. Zhang, C. Hou, W. Yuan, C. Deng, F. Ji, L. Tian, G. Lin, H. Deng and Y. Zhang, *Fuel Cells*, 2022, **23**, 42-50.
15. J. Xi, F. Wang, R. Mei, Z. Gong, X. Fan, H. Yang, L. An, Q. Wu and Z. Luo, *RSC Advances*, 2016, **6**, 90797-90805.
16. L. Osmieri, R. Escudero-Cid, M. Armandi, A. H. A. Monteverde Videla, J. L. García Fierro, P. Ocón and S. Specchia, *Applied Catalysis B: Environmental*, 2017, **205**, 637-653.
17. L. Cao, W. Yang, H. Zou, S. Chen and Z. Liu, *J. Inorg. Organomet. Polym. Mater.*, 2019, **29**, 1886-1894.
18. X. Xu, X. Zhang, Z. Xia, R. Sun, J. Wang, Q. Jiang, S. Yu, S. Wang and G. Sun, *ACS Appl. Mater. Interfaces*, 2021, **13**, 16279-16288.
19. E. Giordano, E. Berretti, L. Capozzoli, A. Lavacchi, M. Muhyuddin, C. Santoro, I. Gatto, A. Zaffora and M. Santamaria, *J. Power Sources*, 2023, **563**.
